# Supplementary material for: Molecular dynamics simulations of self-assembled peptide amphiphile based cylindrical nanofibers
Source: Royal Society of Chemistry journal article supplement (doi:10.1039/c5ra10685k), 2015-01-01
Supplement: c5ra10685k1.pdf [file c5ra10685k1.pdf]

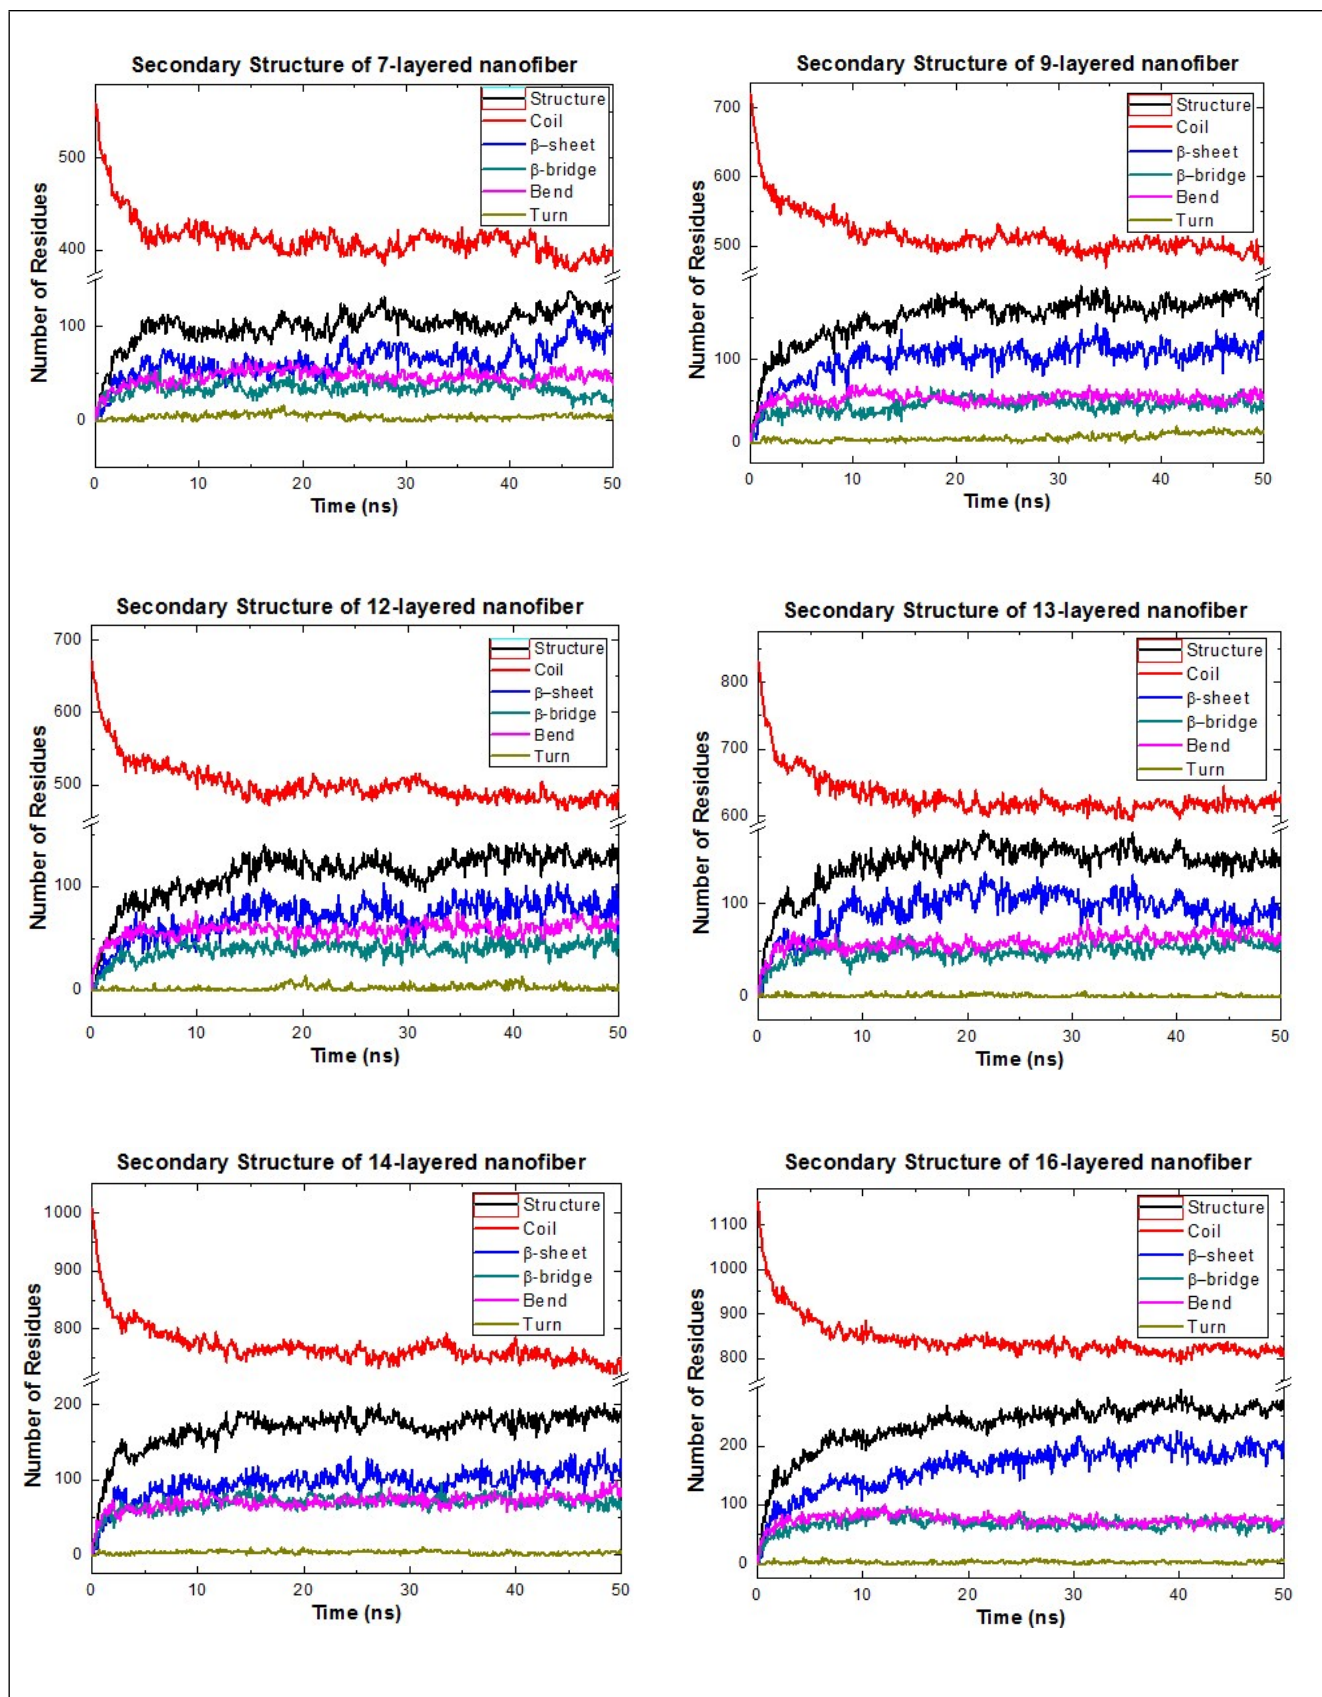

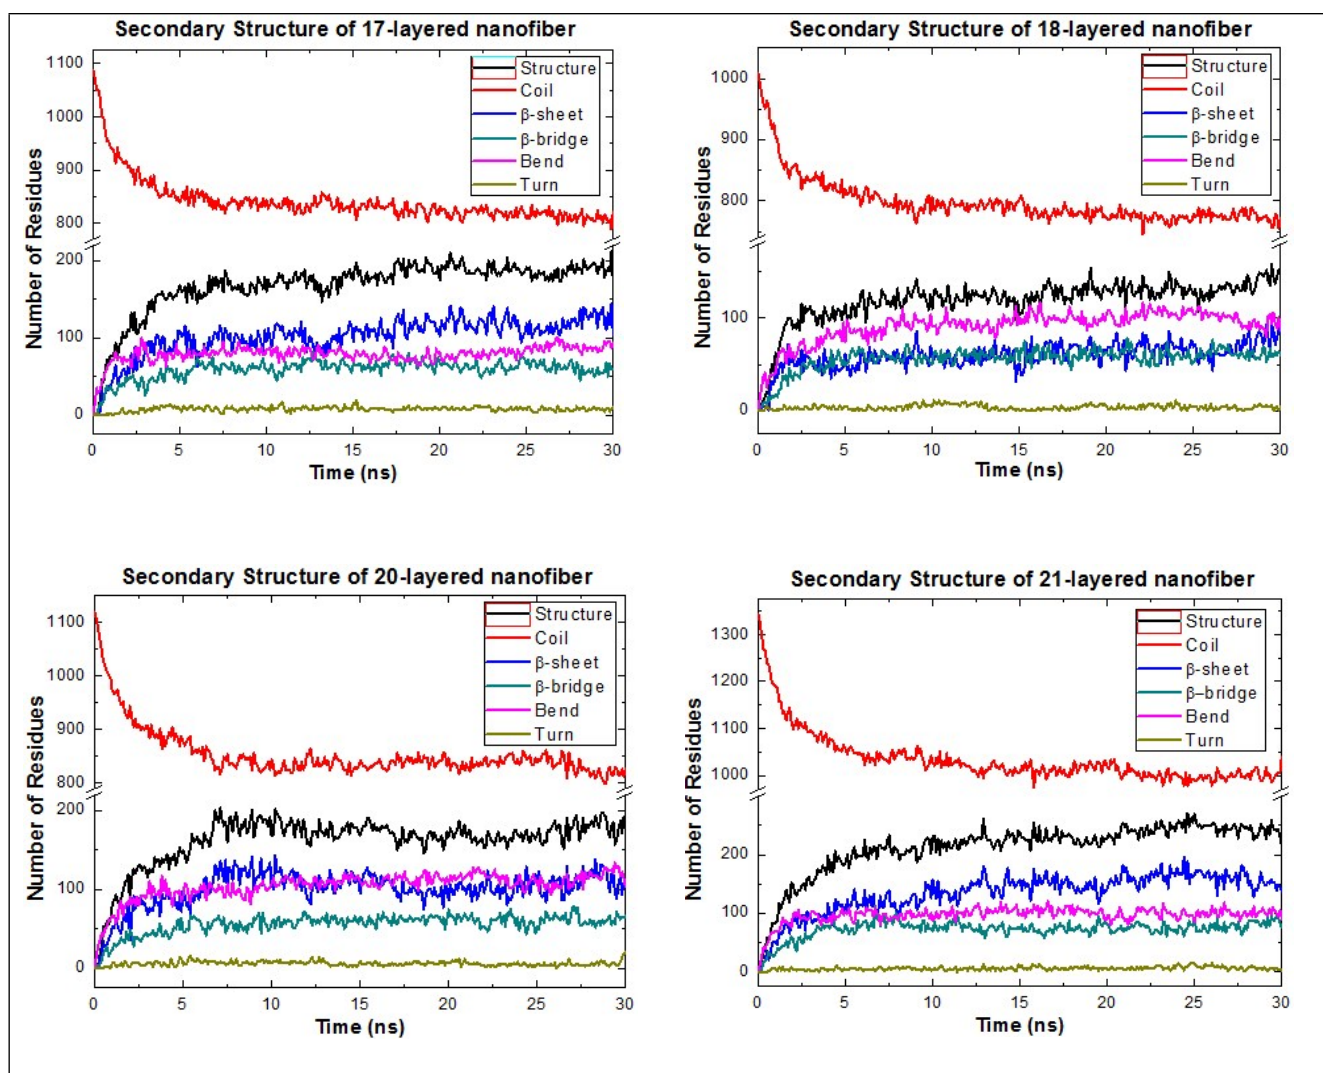

**Figure S1:** Plots of the number of residues forming secondary structure elements of the nanofibers over the simulation time.

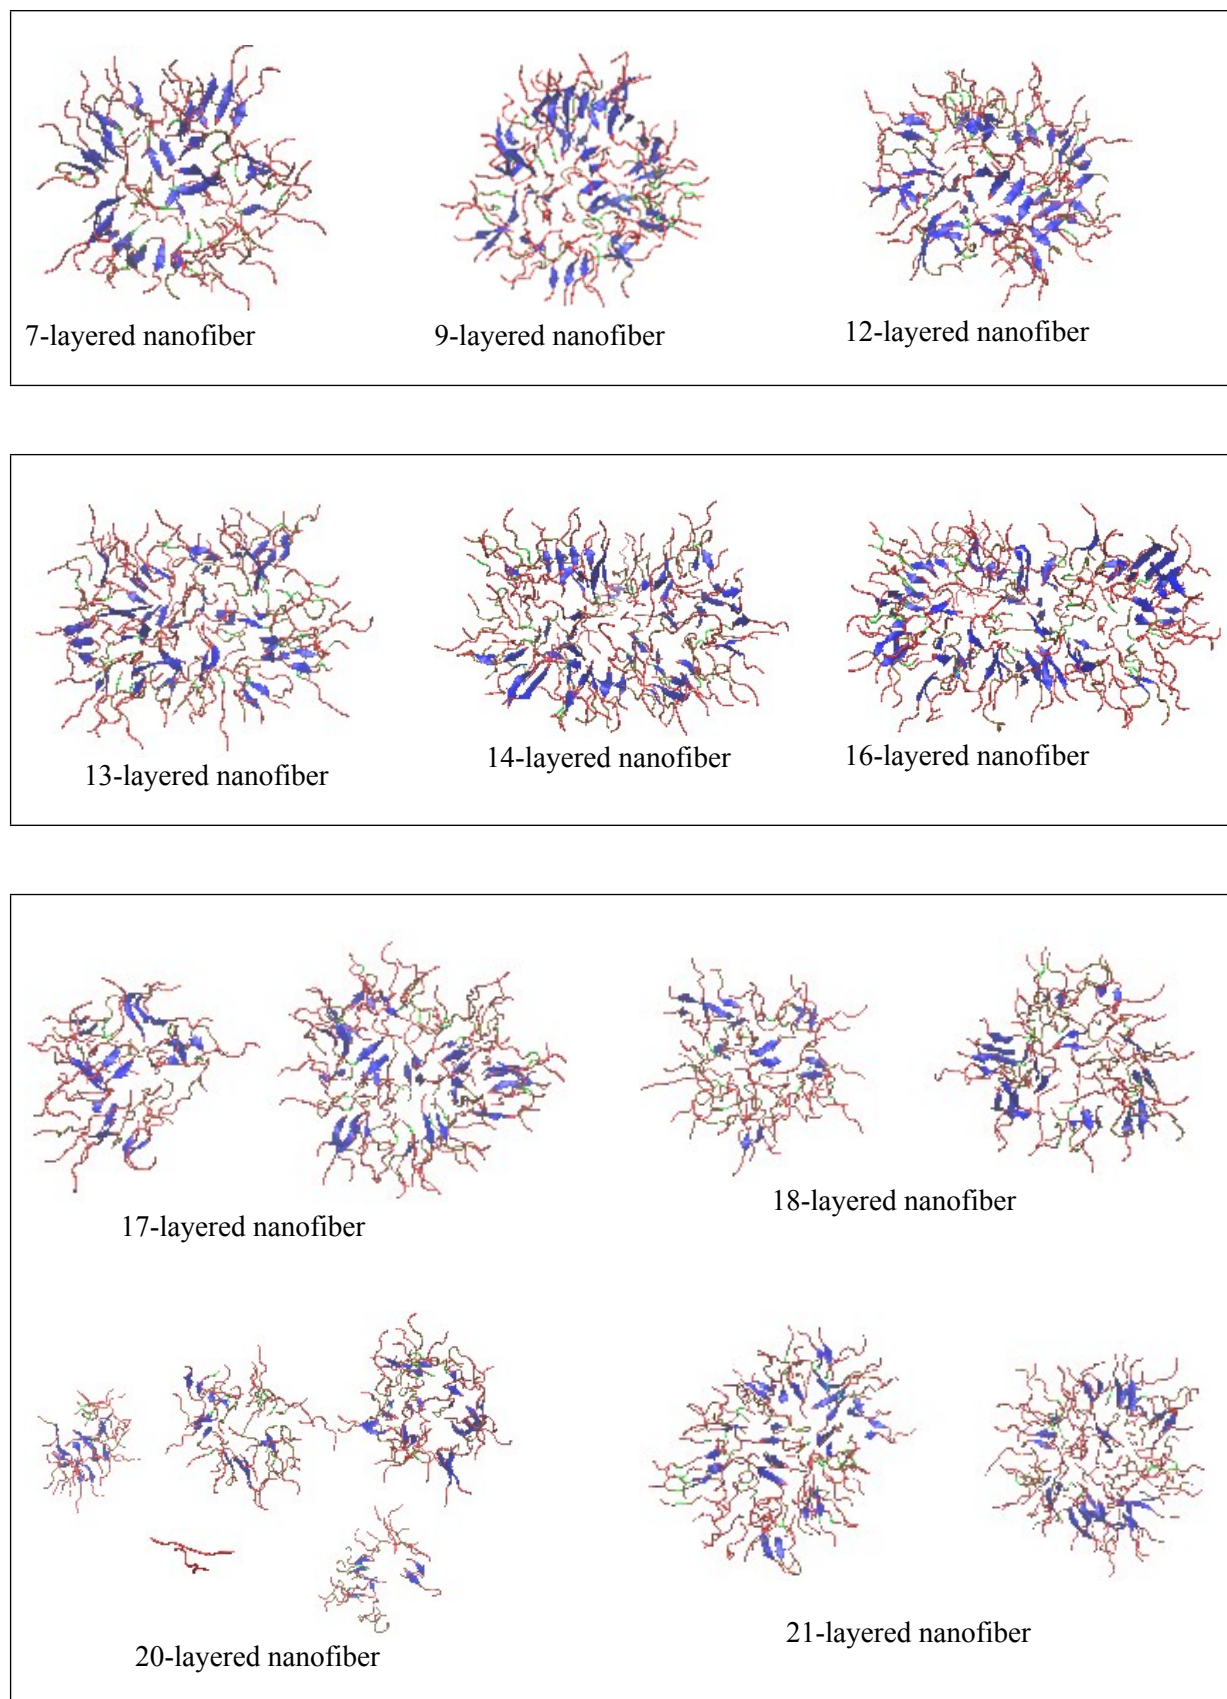

**Figure S2:**  $\beta$ -sheets in the self-assembled nanofibers at 50<sup>th</sup> ns.



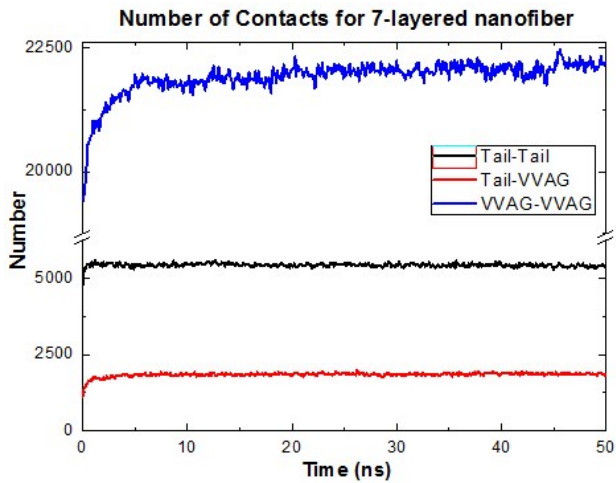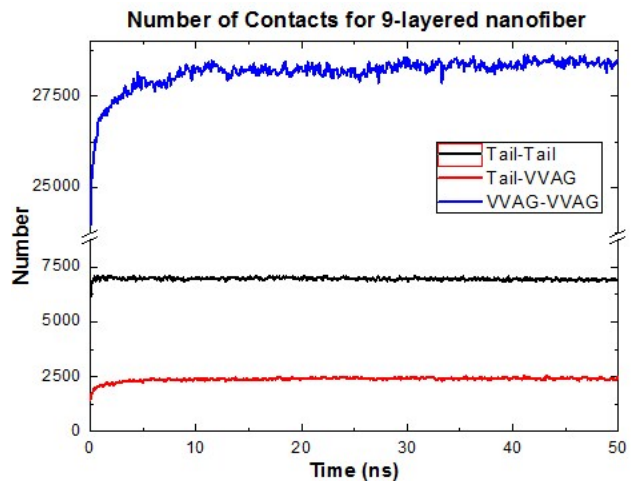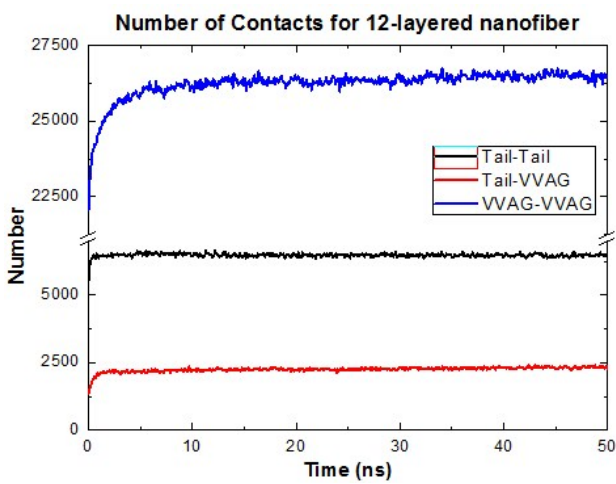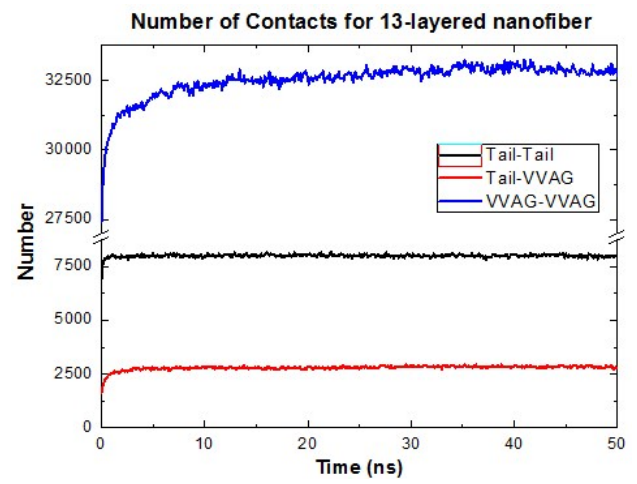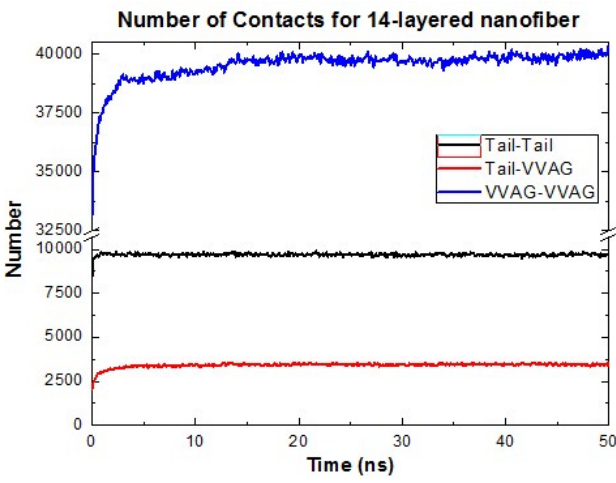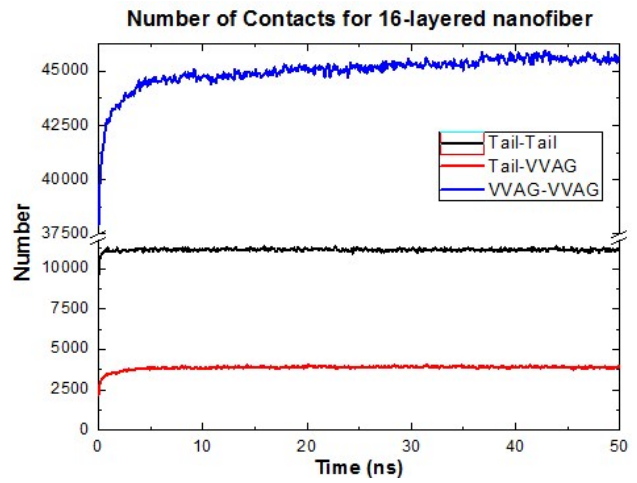

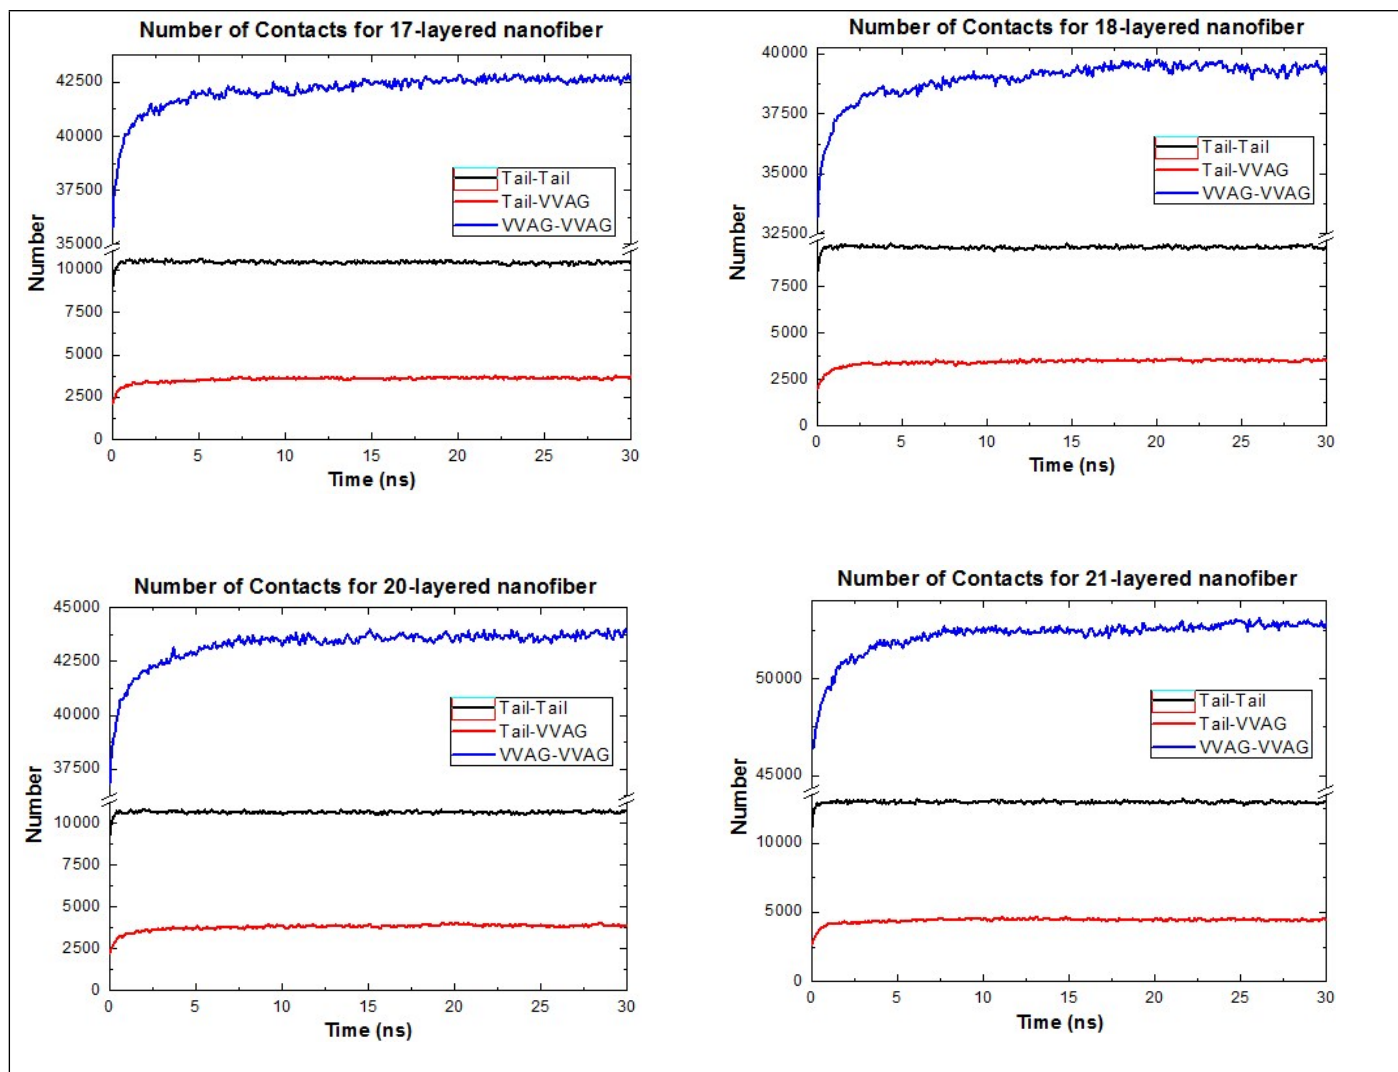

**Figure S3:** Hydrophobic interactions (number of contacts  $< 0.4 \text{ nm}$ ) of the nanofibers over the simulation time.

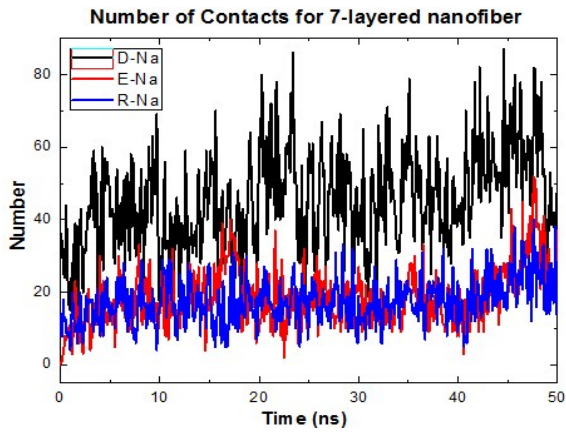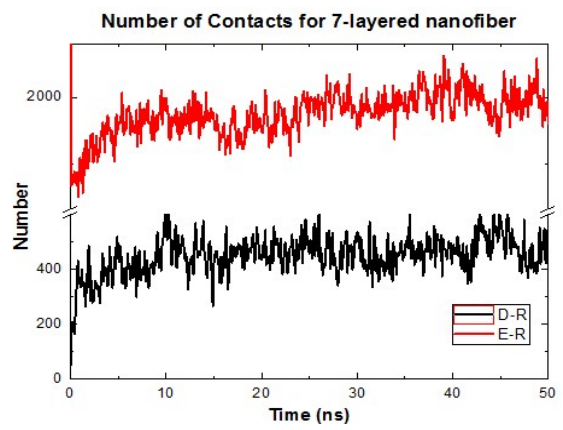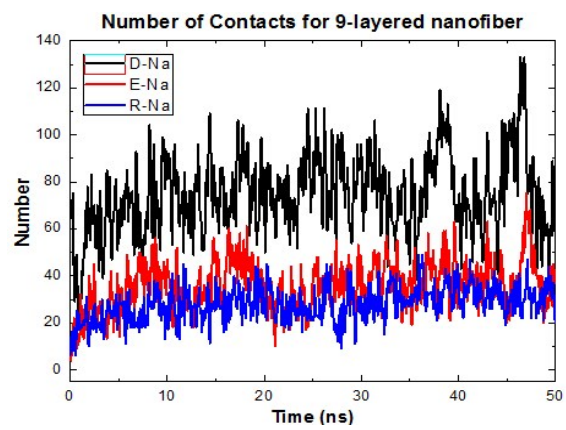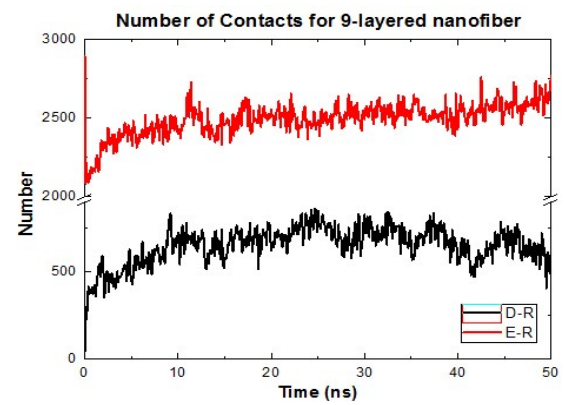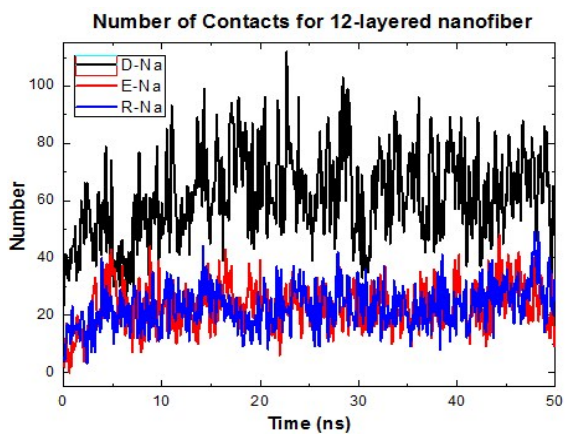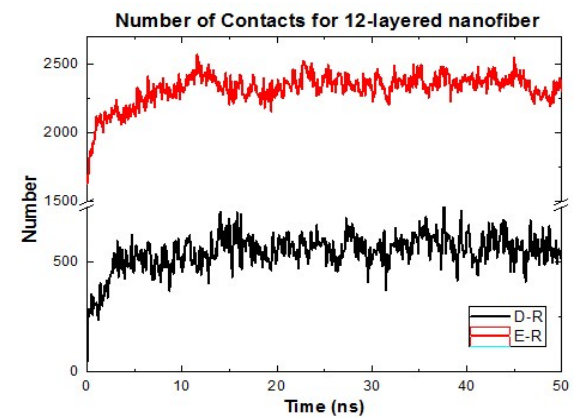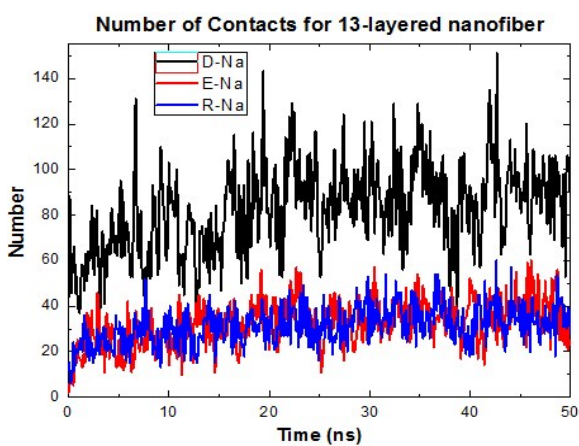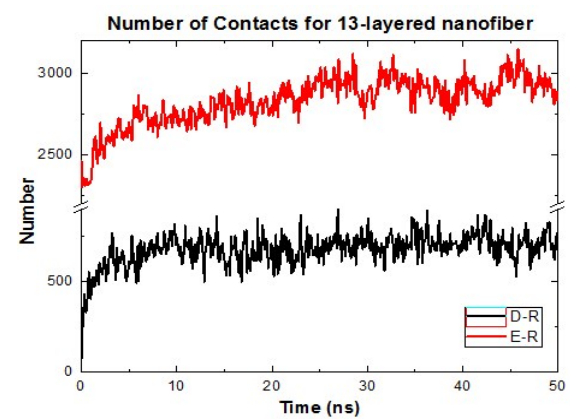



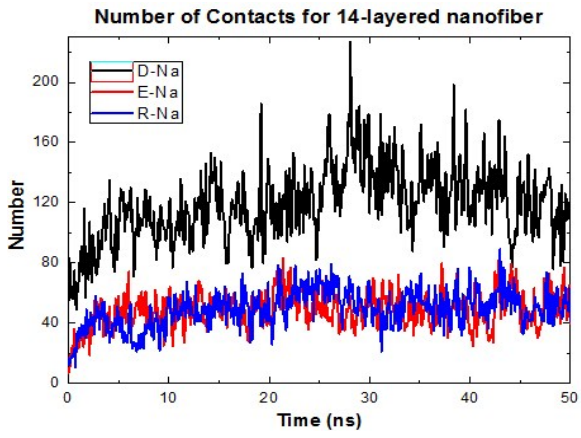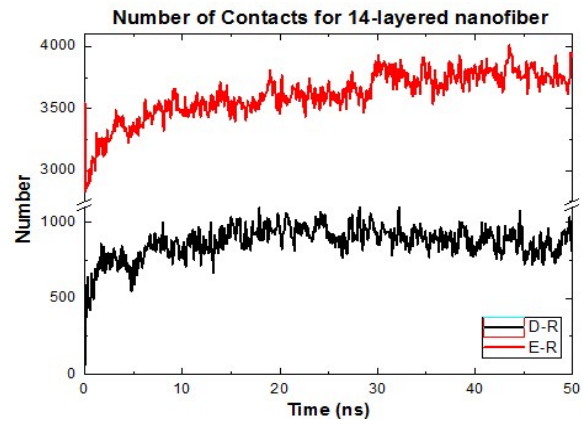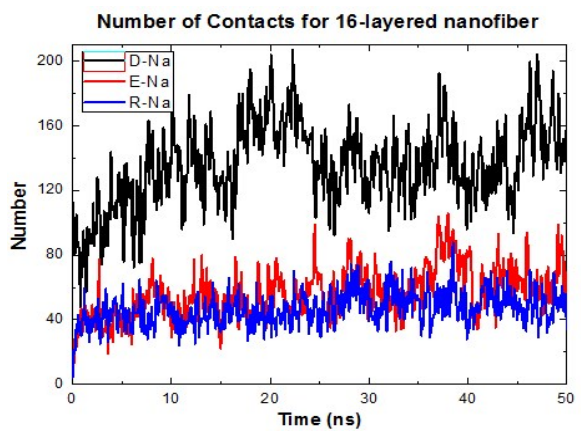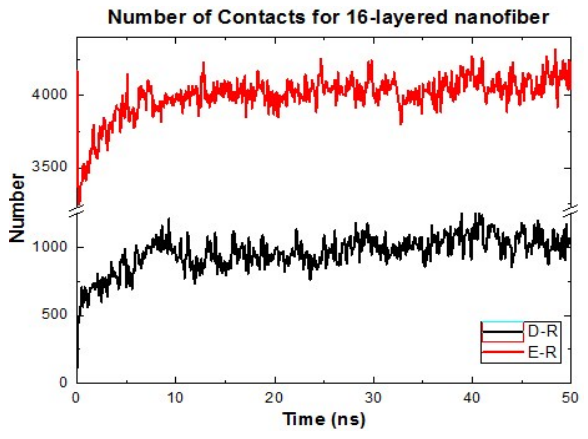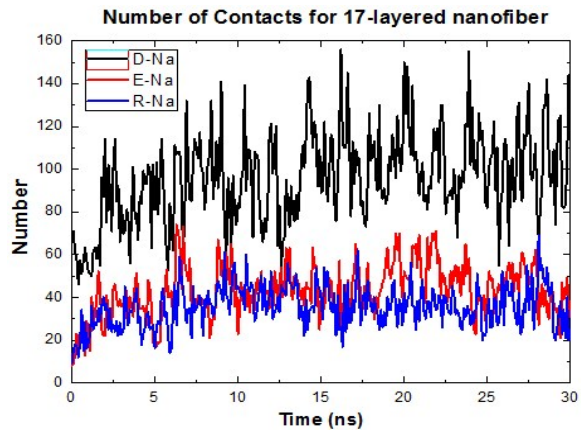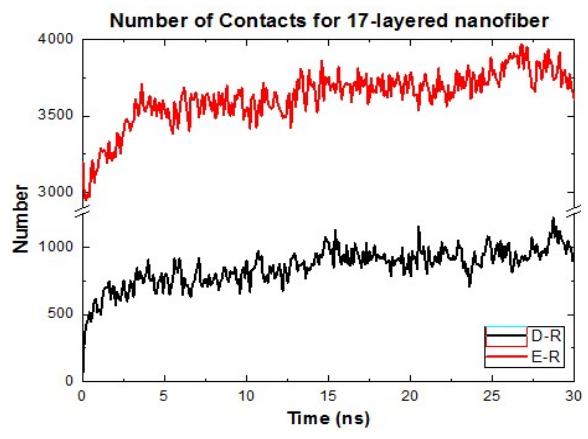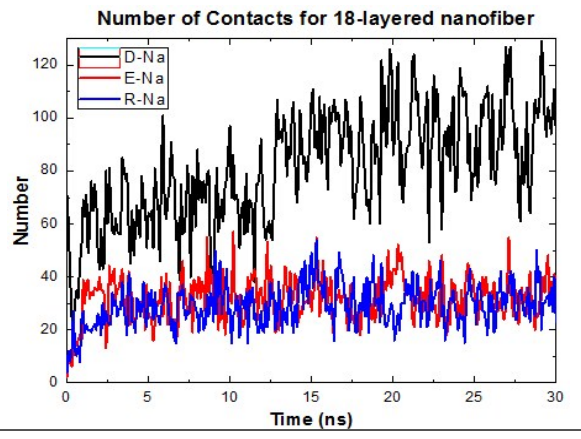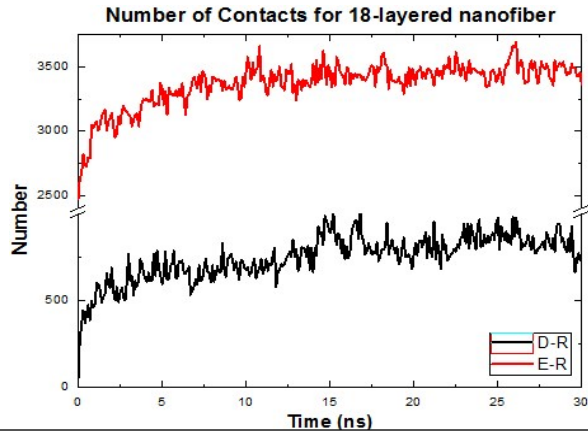

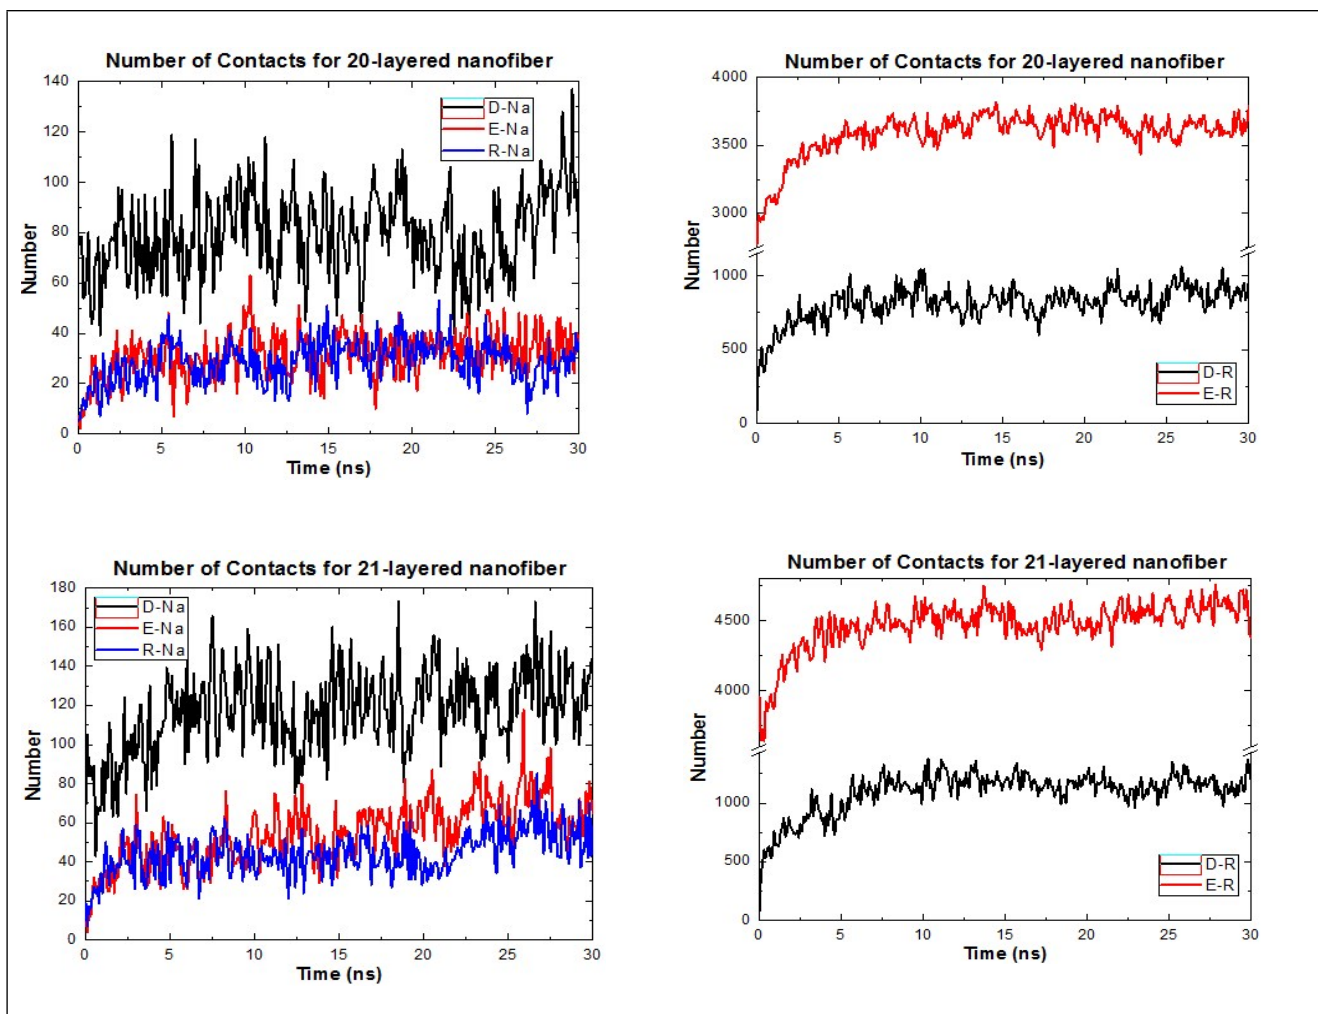

**Figure S4:** Electrostatic interactions (number of contacts  $< 0.4 \text{ nm}$ ) of the nanofibers over the simulation time.



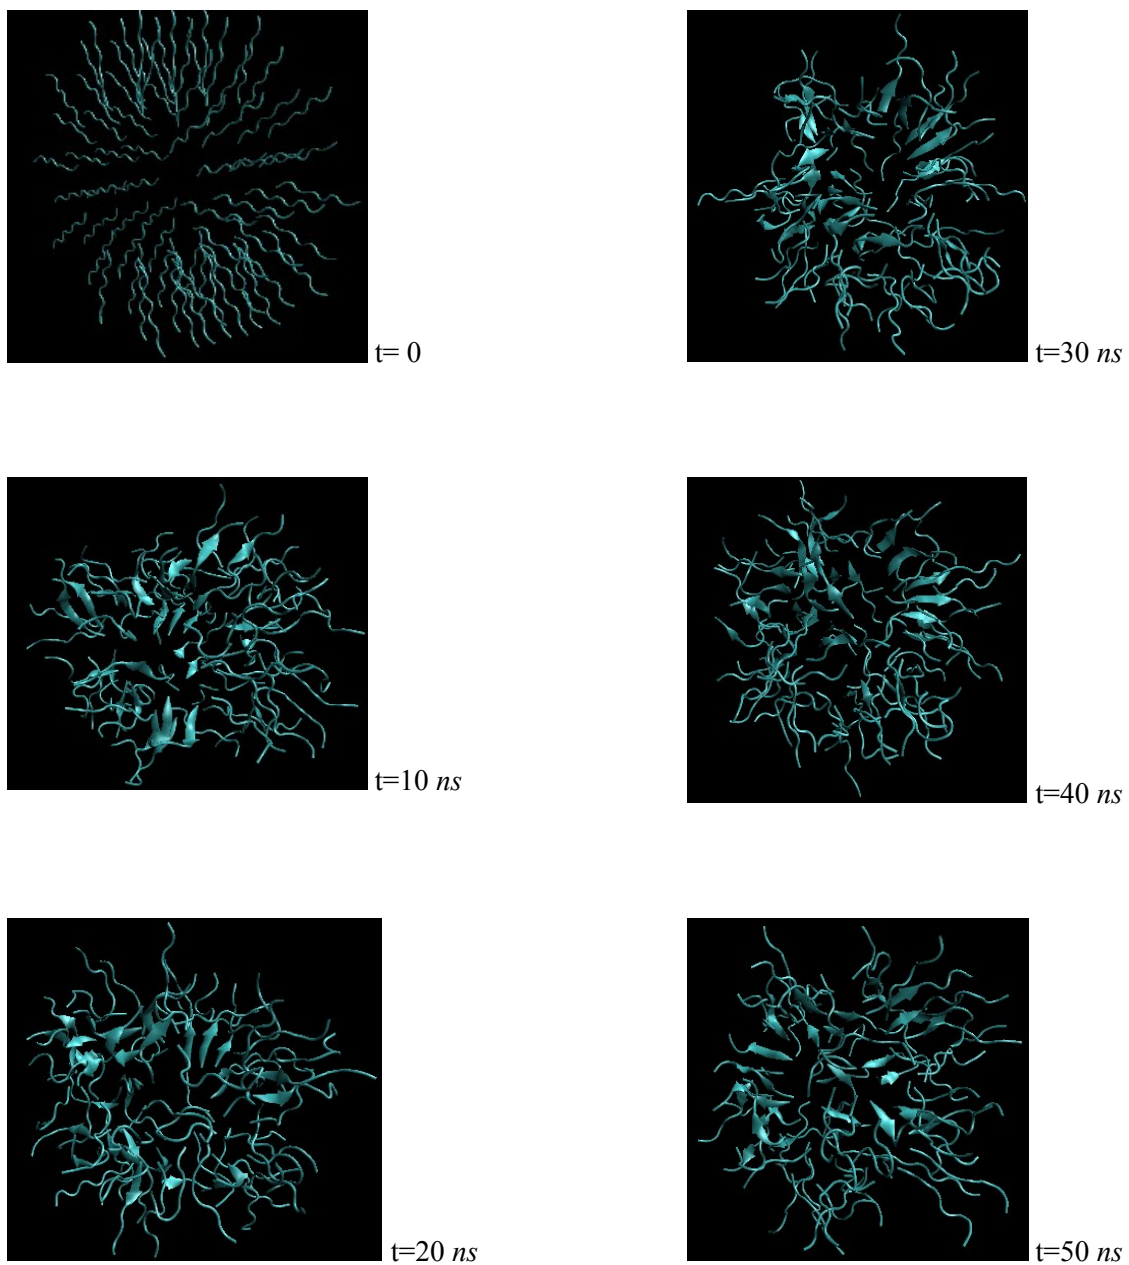

**Figure S5.** Snapshots of self-assembled 7-layered nanofiber for each 10 ns of 50 ns simulation.

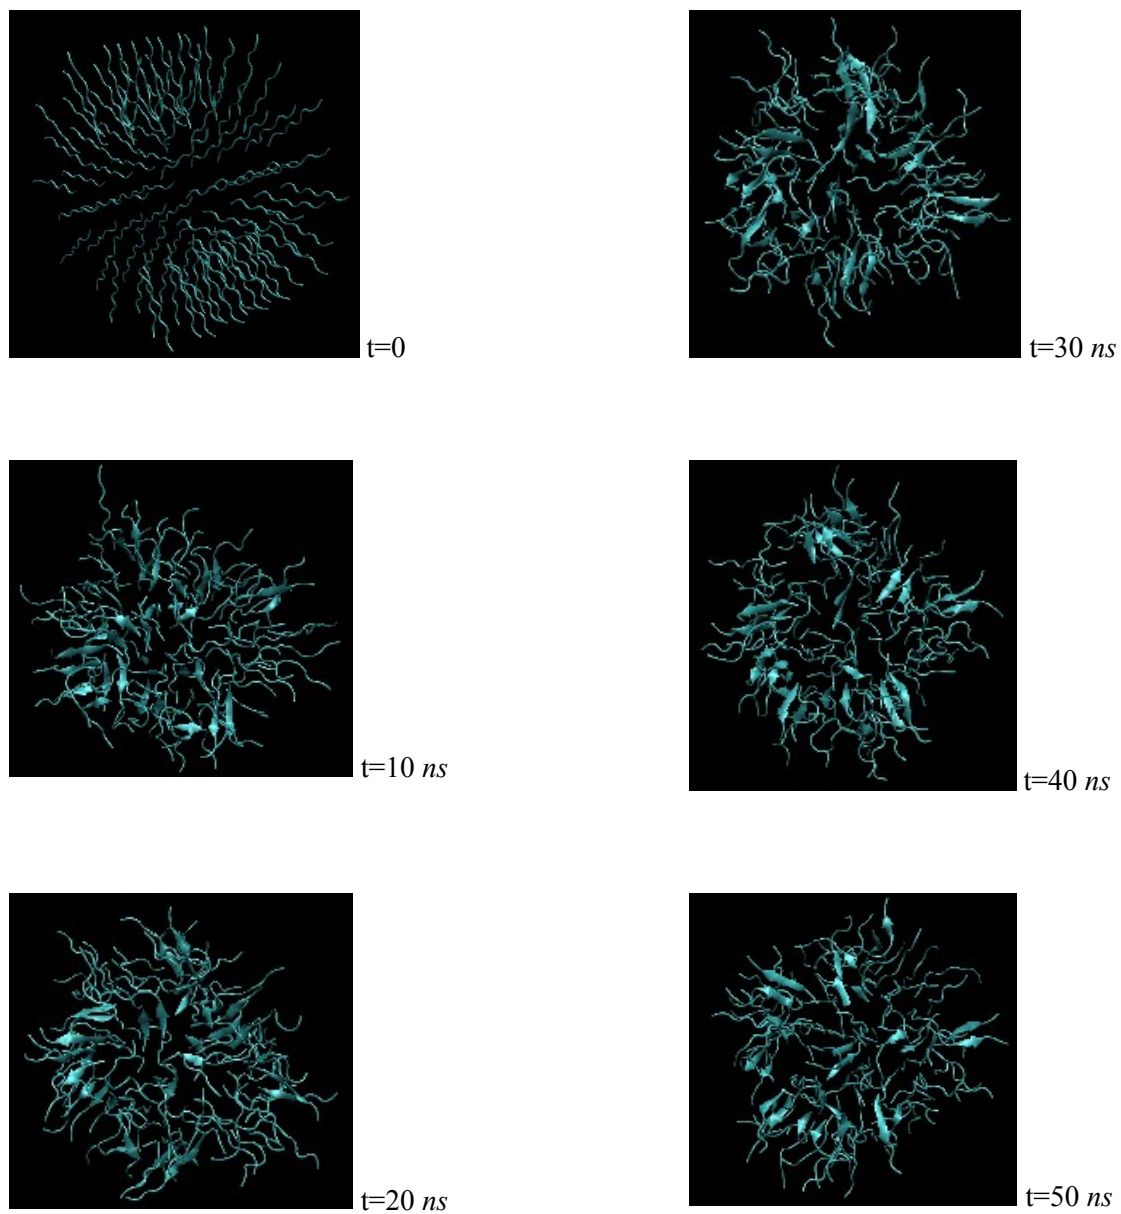

**Figure S6.** Snapshots of self-assembled 9-layered nanofiber for each 10 *ns* of 50 *ns* simulation.

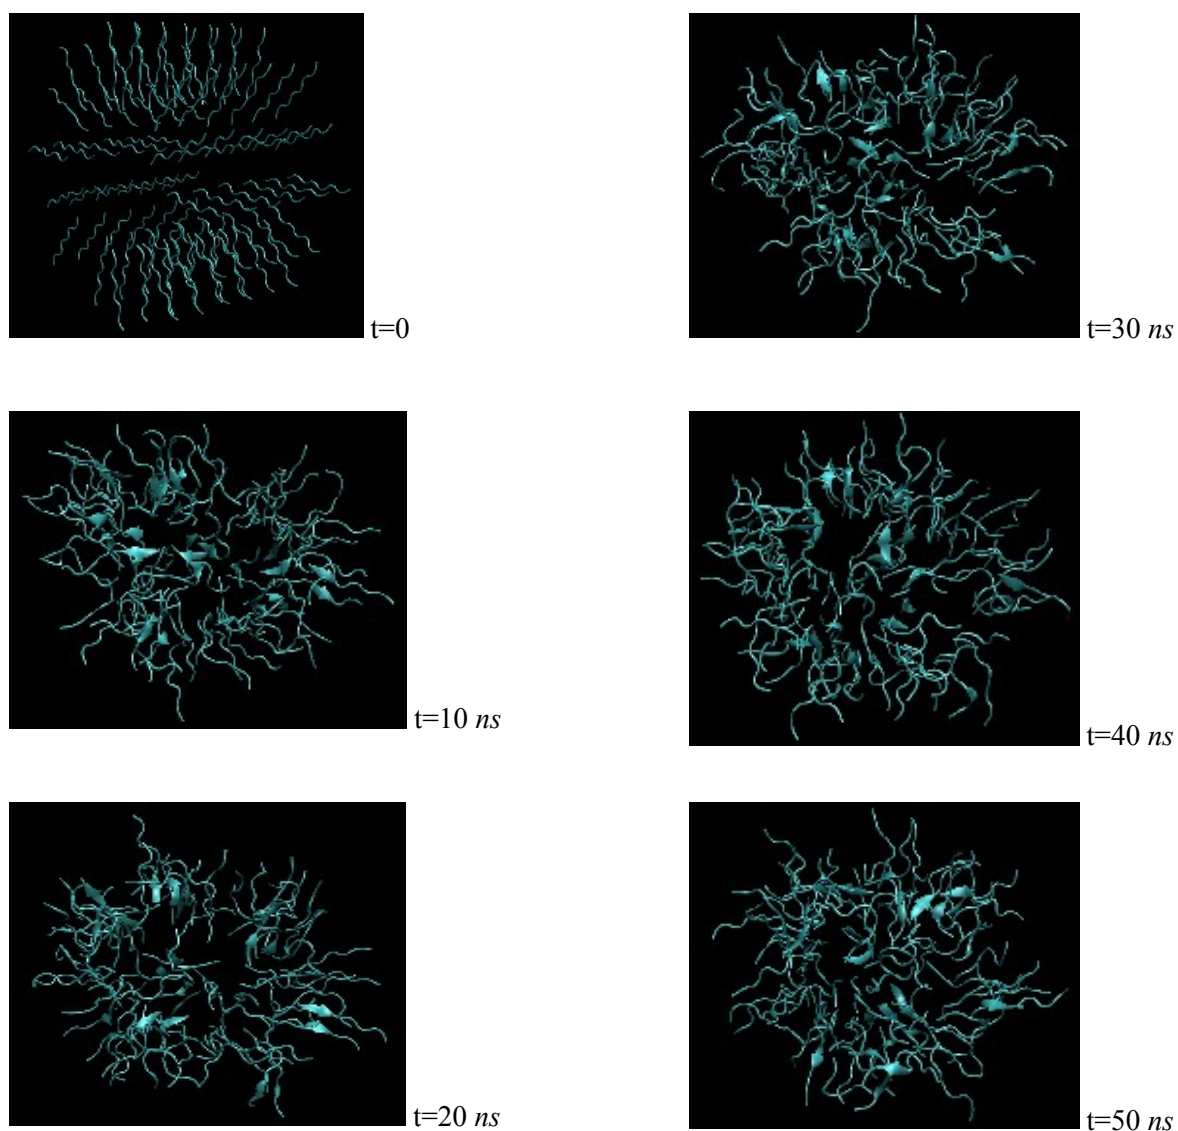

**Figure S7.** Snapshots of self-assembled 12-layered nanofiber for each 10 *ns* of 50 *ns* simulation.



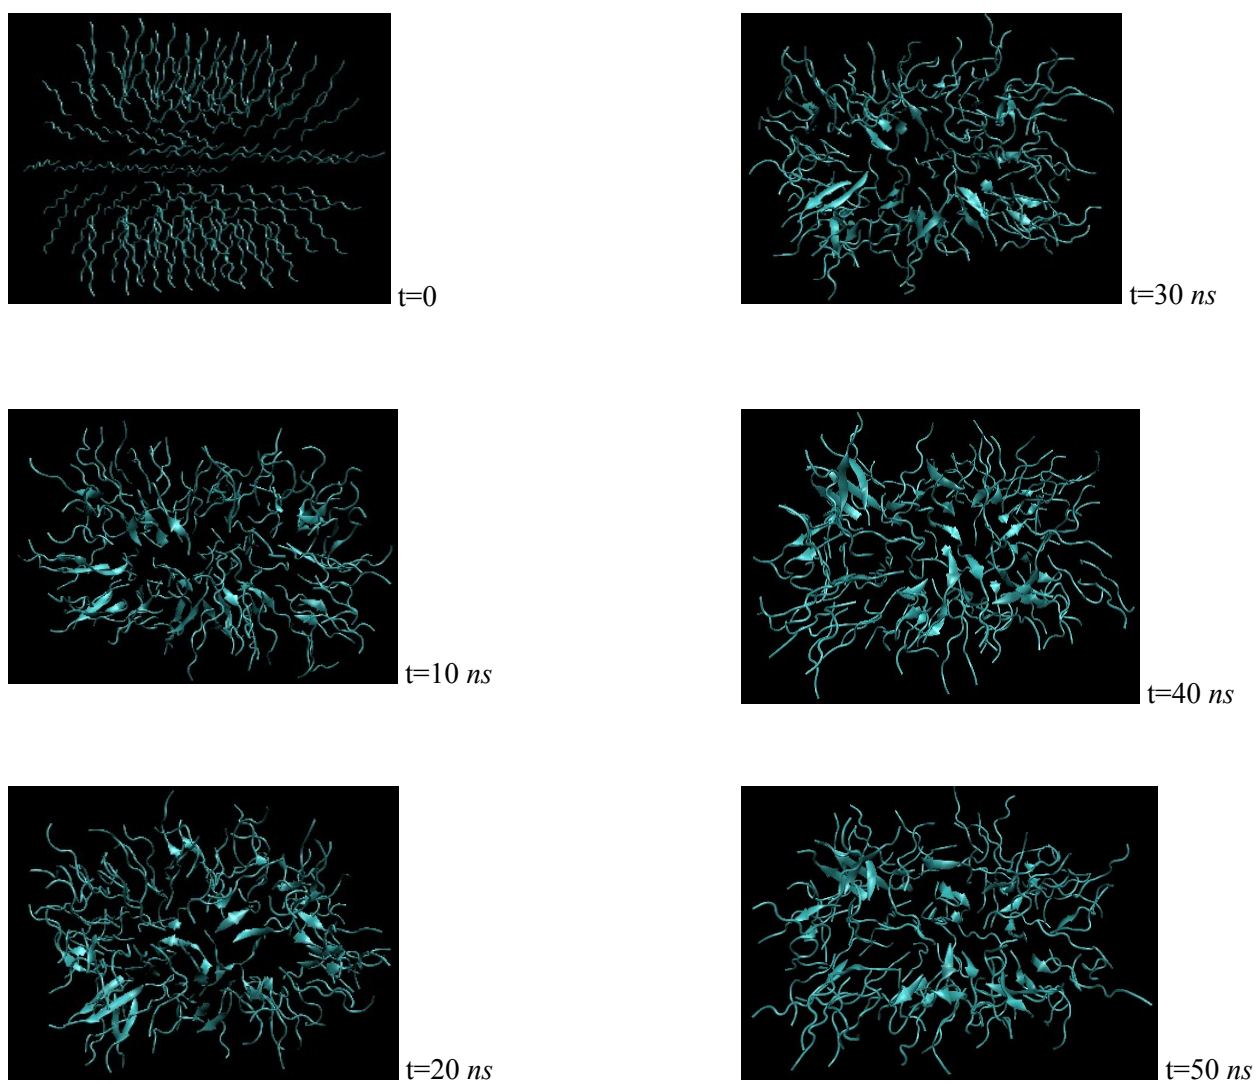

**Figure S8.** Snapshots of self-assembled 13-layered nanofiber for each 10 *ns* of 50 *ns* simulation.

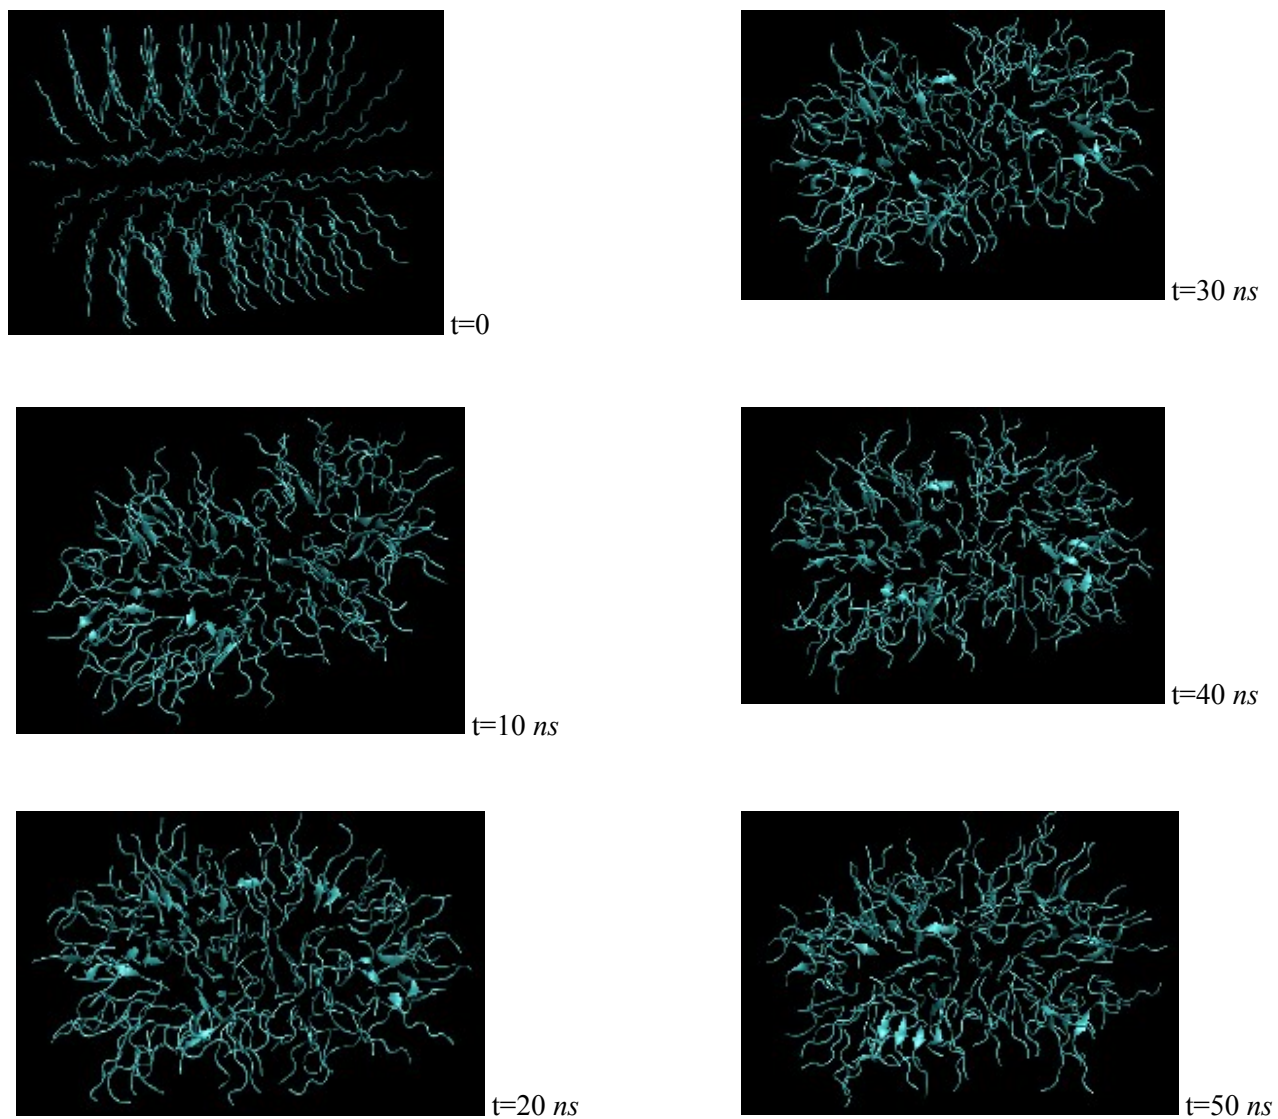

**Figure S9.** Snapshots of self-assembled 14-layered nanofiber for each 10 *ns* of 50 *ns* simulation.

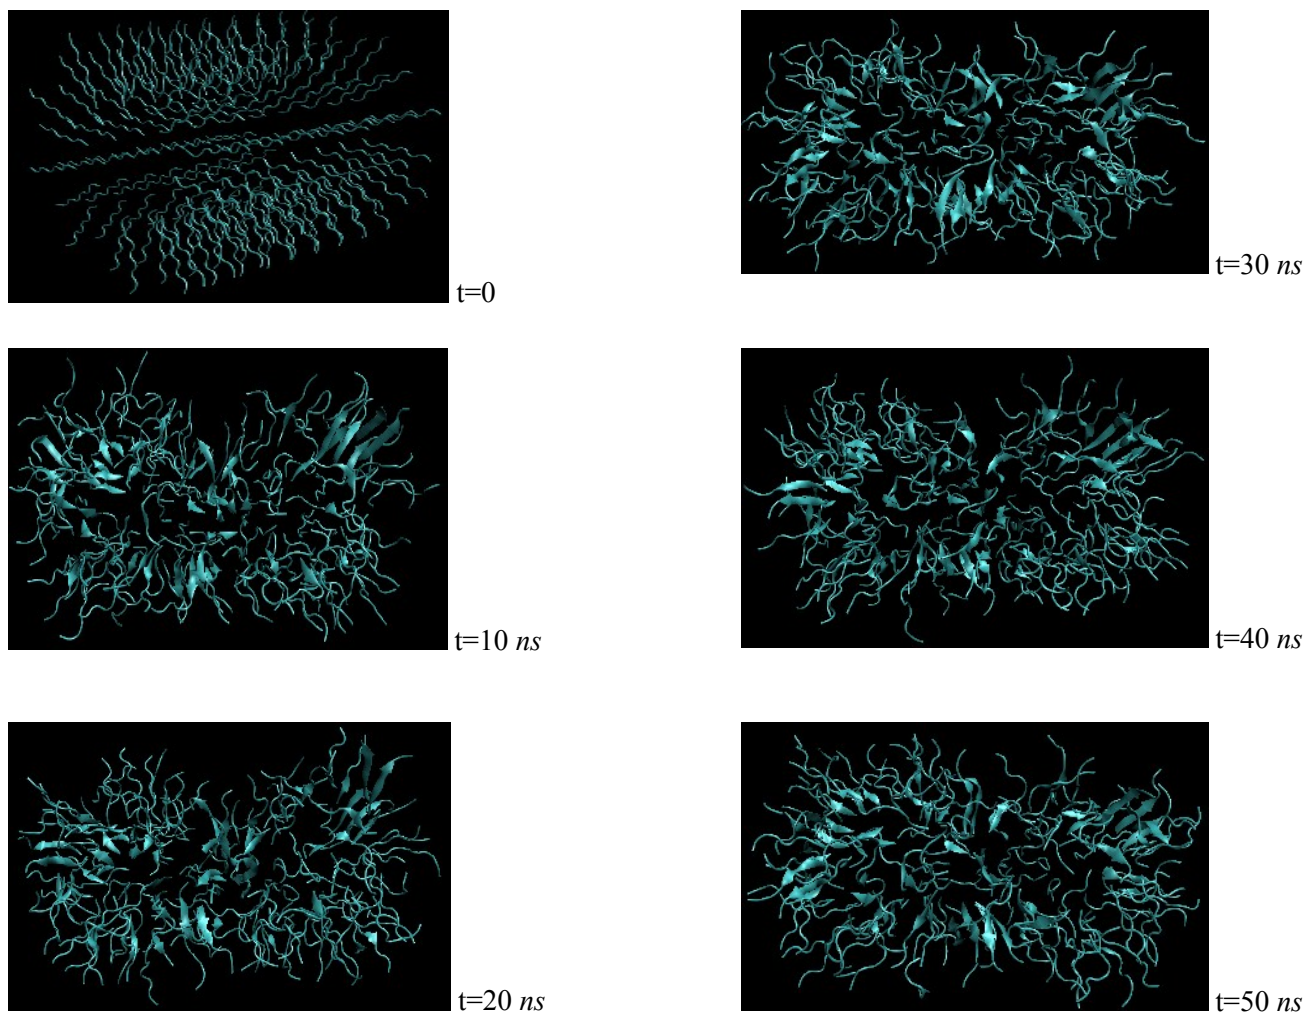

**Figure S10.** Snapshots of self-assembled 16-layered nanofiber for each 10 *ns* of 50 *ns* simulation.



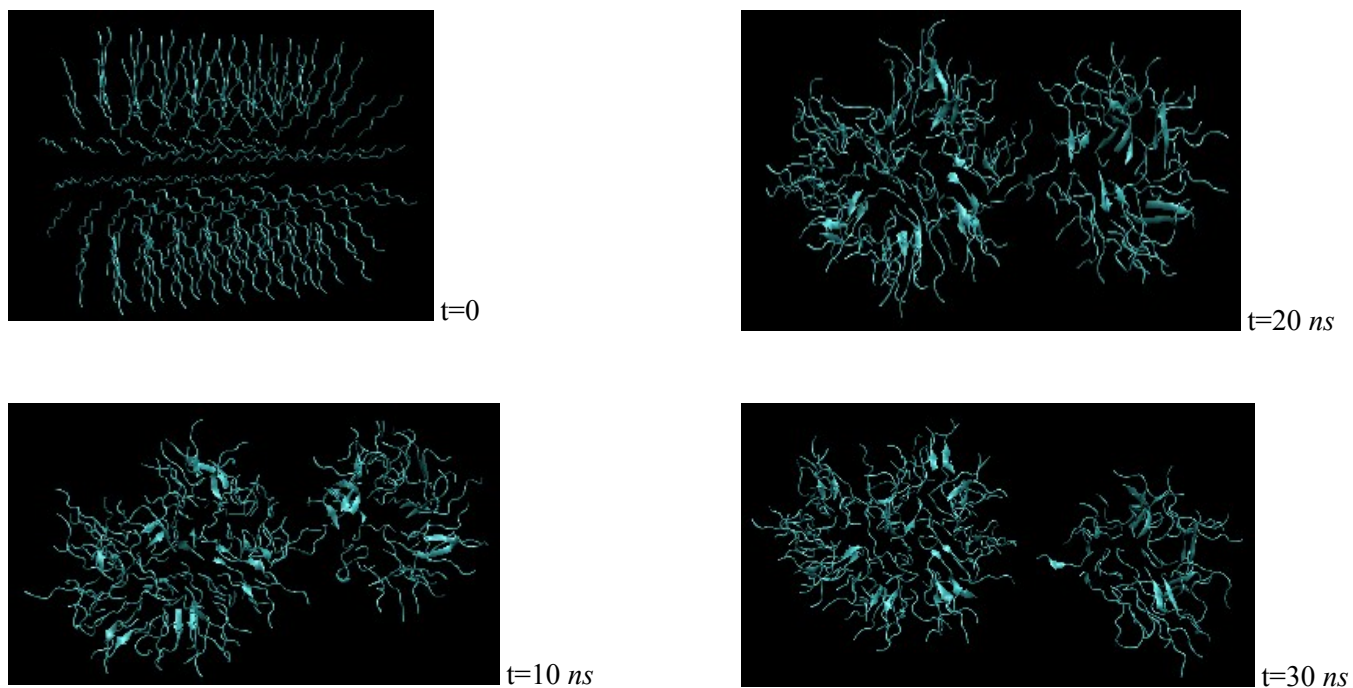

**Figure S11.** Snapshots of self-assembled 17-layered nanofiber for each 10 *ns* of 30 *ns* simulation.

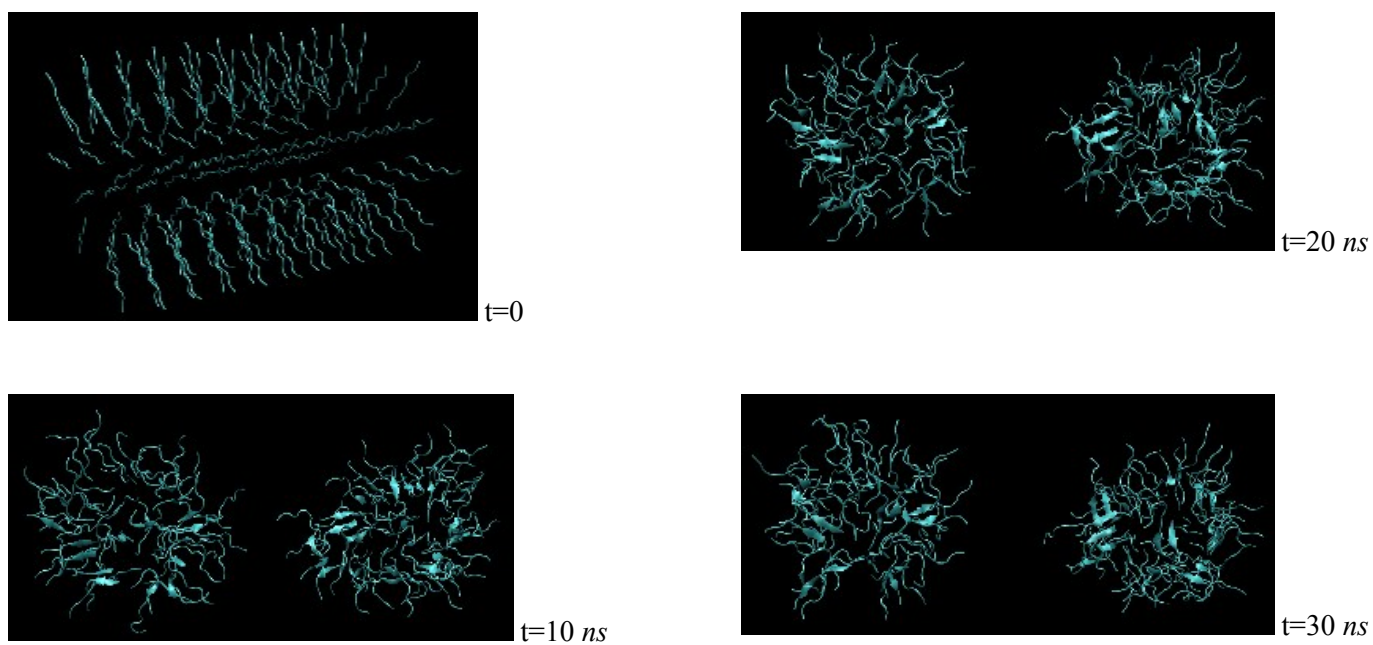

**Figure S12.** Snapshots of self-assembled 18-layered nanofiber for each 10 *ns* of 30 *ns* simulation.

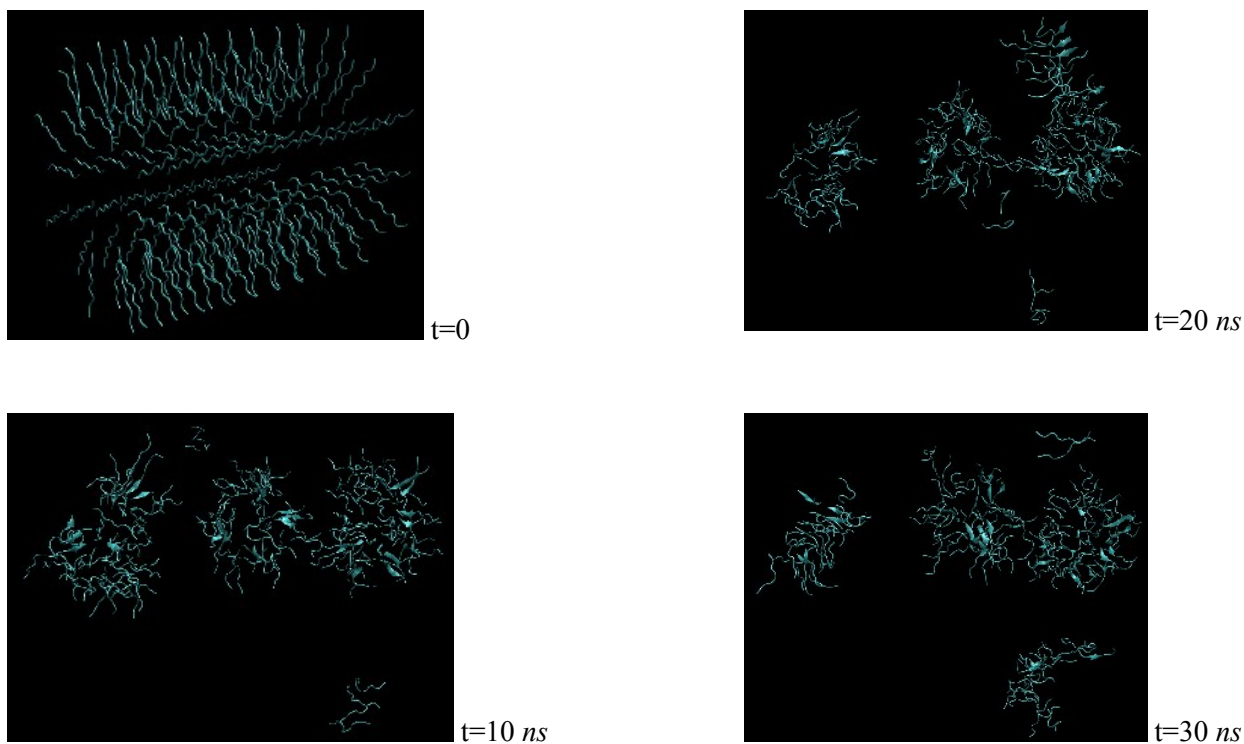

**Figure S13.** Snapshots of self-assembled 20-layered nanofiber for each 10 *ns* of 30 *ns* simulation.

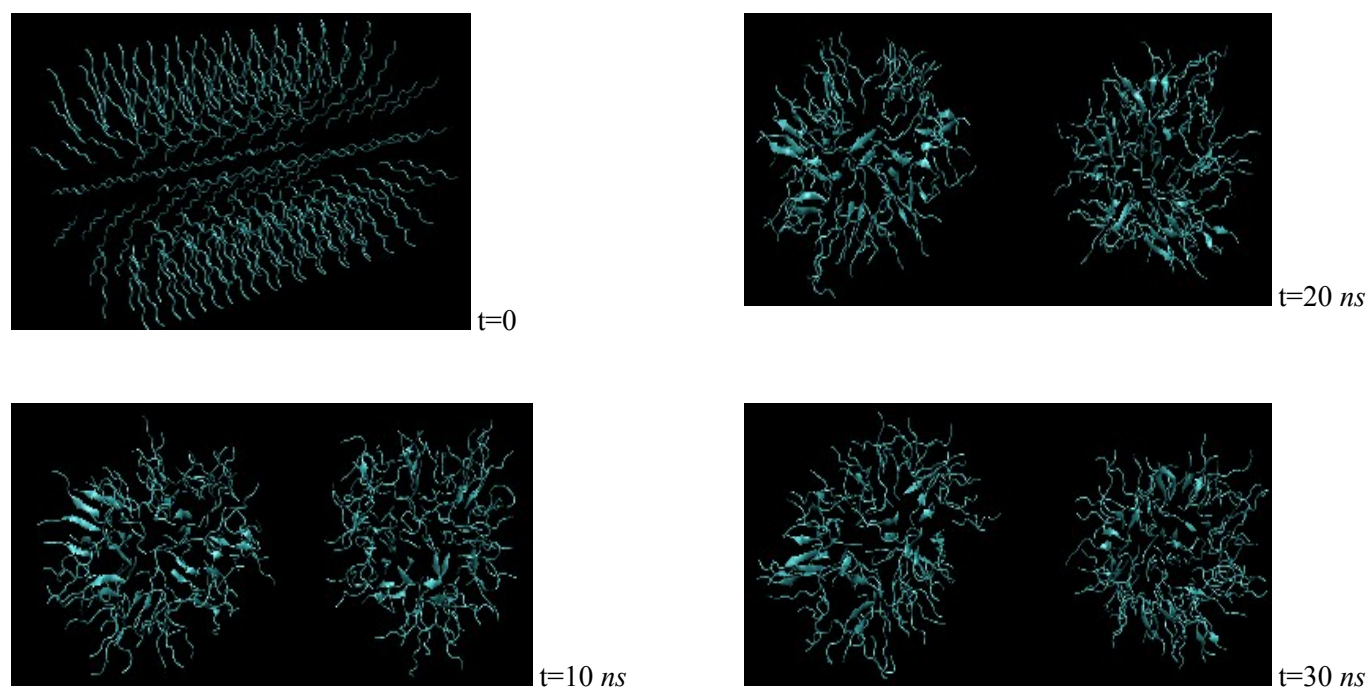

**Figure S14.** Snapshots of self-assembled 21-layered nanofiber for each 10 *ns* of 30 *ns* simulation.
